# Supplementary material for: Nonlinear ferroelectric characteristics of barium titanate nanocrystals determined via a polymer nanocomposite approach
Source: Royal Society of Chemistry journal article supplement (doi:10.1039/d3nr05185d), 2024-01-01
Supplement: d3nr05185d1.pdf [file d3nr05185d1.pdf]

## Supporting Information

### Nonlinear ferroelectric characteristics of barium titanate nanocrystals determined via a polymer nanocomposite approach

Qiong Li <sup>1</sup>, Elshad Allahyarov <sup>2,3,4</sup>, Tianxiong Ju <sup>1</sup>, Zhiqun Lin <sup>5,\*</sup>, and Lei Zhu <sup>1,\*</sup>

<sup>1</sup> *Department of Macromolecular Science and Engineering, Case Western Reserve University, Cleveland, Ohio 44106, United States*

<sup>2</sup> *Institut für Theoretische Physik II: Weiche Materie, Heinrich-Heine Universität at Düsseldorf, Universitätstrasse 1, 40225 Düsseldorf, Germany*

<sup>3</sup> *Theoretical Department, Joint Institute for High Temperatures, Russian Academy of Sciences (IVTAN), 13/19 Izhorskaya Street, Moscow 125412, Russia*

<sup>4</sup> *Department of Physics, Case Western Reserve University, Cleveland, Ohio 44106-7079, United States*

<sup>5</sup> *Department of Chemical and Biomolecular Engineering, National University of Singapore, Singapore 117585, Singapore*

\* Corresponding authors. Emails: [lxz121@case.edu](mailto:lxz121@case.edu) (L.Z.) and [z.lin@nus.edu.sg](mailto:z.lin@nus.edu.sg) (Z.L.)

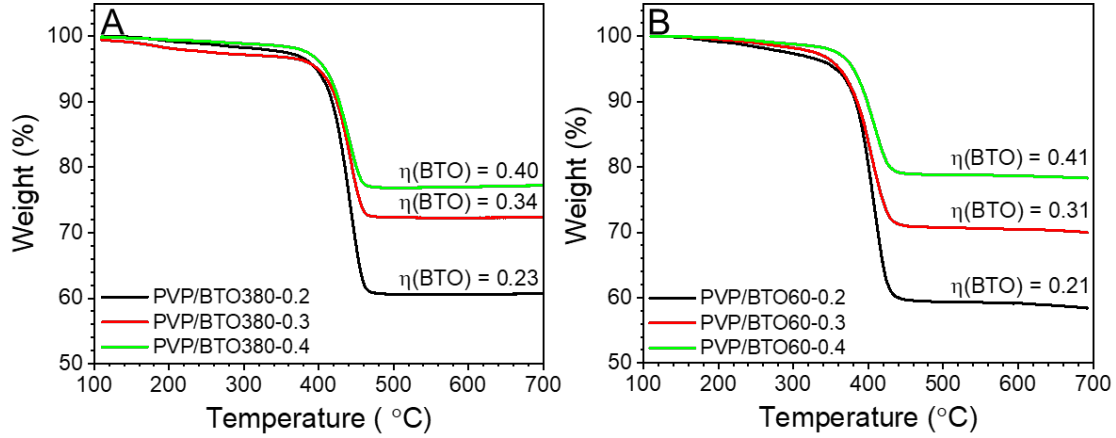

**Fig. S1.** TGA results for (A) PVP/BTO380 and (B) PVP/BTO60 nanocomposites. The heating rate is 10 °C/min.

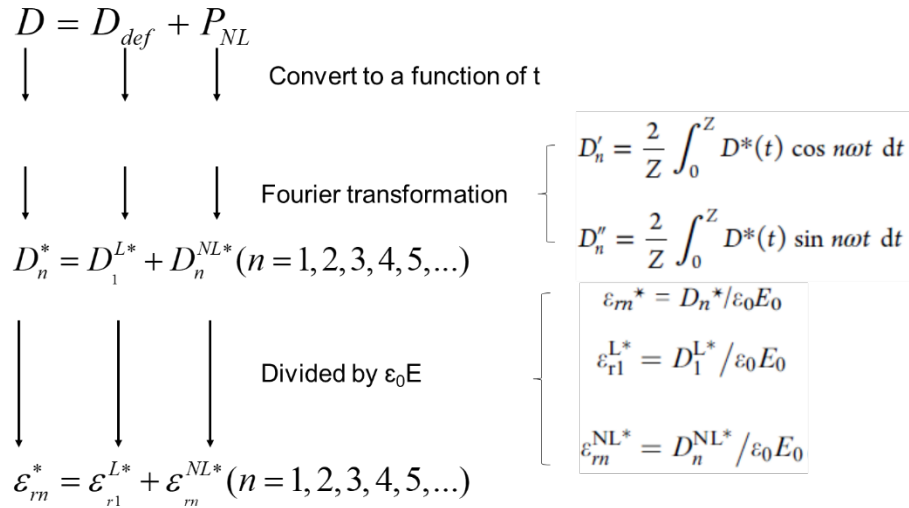

**Scheme S1.** Procedure for nonlinear dielectric analysis.

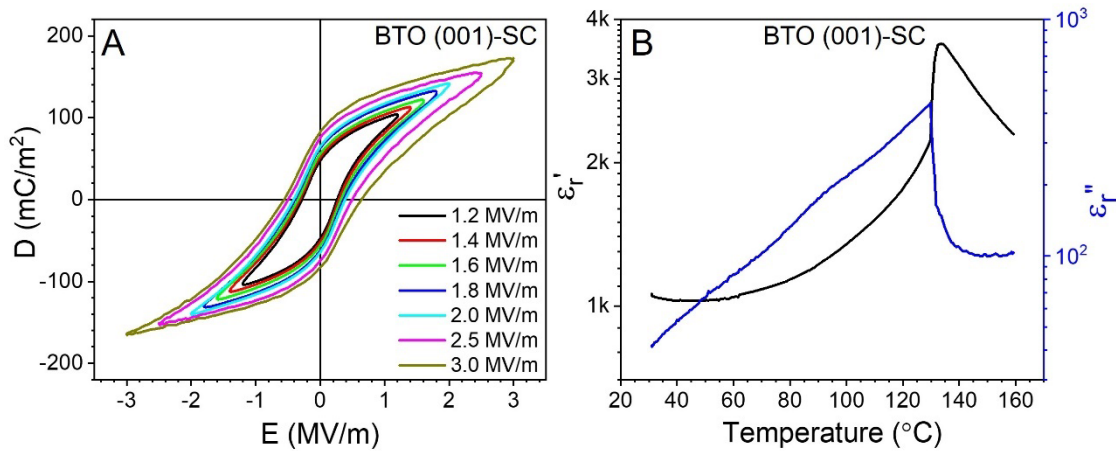

**Fig. S2.** (A) Bipolar D-E experimental loops for the BaTiO<sub>3</sub> (001)-single crystal at  $E > 1.0$  MV/m. (B) Temperature-scan BDS results for the BaTiO<sub>3</sub> (001)-single crystal at 10 Hz.
